# Supplementary material for: Oestrogen enforces the integrity of blood vessels in the bone during pregnancy and menopause
Source: PubMed Central journal article supplement (PMC7613952; doi:10.1038/s44161-022-00139-0), 2022-10-12
Supplement: EMS153774-supplement-Supplementary_information.pdf [file EMS153774-supplement-Supplementary_information.pdf]

**a**

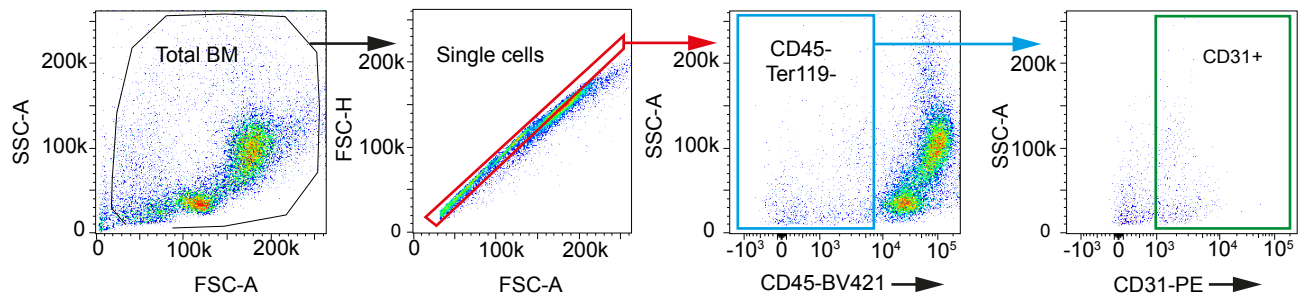

**b**

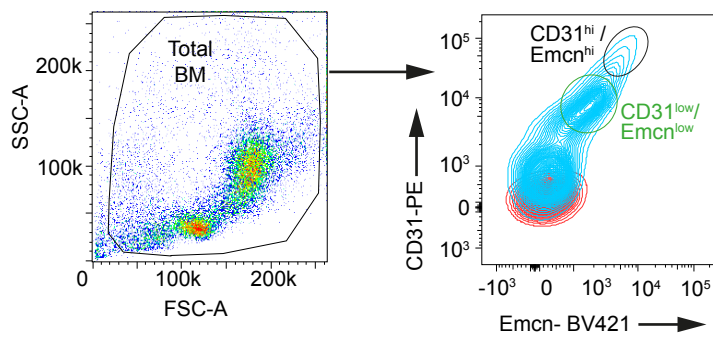

**Supplementary Figure 1: Flow cytometry gating strategy**

- a, Flow cytometry plots showing gating strategy for total ECs (CD31+ CD45- Ter119-).
- b, Flow cytometry plots showing gating strategy for type-H ECs (CD31<sup>high</sup> Emcn<sup>high</sup>).

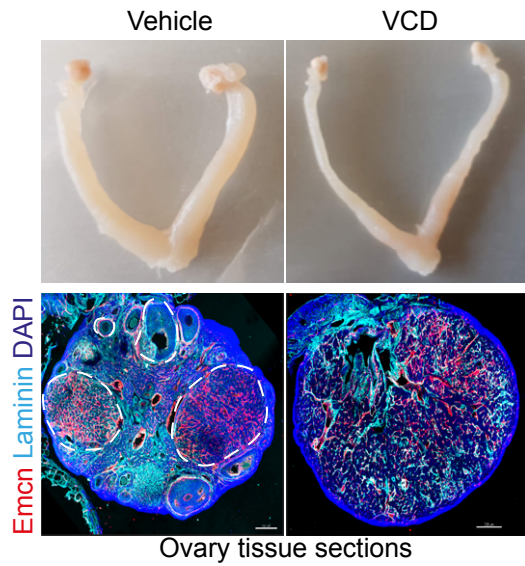

**Supplementary Figure 2: Depletion of ovarian follicles by VCD treatment**

Representative dissected ovaries attached to uterine horns of Vehicle and VCD-administered female mice, illustrating smaller VCD ovaries with flaccid uterine horns. Confocal images of ovary tissue sections from Vehicle and VCD mice (n=5 mice) show depleted ovarian follicles in VCD ovaries. Scale bars 200um
